# Supplementary material for: Tomato Spotted Wilt Virus Benefits a Non-Vector Arthropod, Tetranychus Urticae, by Modulating Different Plant Responses in Tomato
Source: PLoS One. 2013 Sep 18;8(9):e75909. doi: 10.1371/journal.pone.0075909 (PMC3776767; doi:10.1371/journal.pone.0075909)
Supplement: Table S3 — Differentially-expressed genes in tomato plants infested with TSM. Statistically significant (P< 0.05, fold change > ± 2). (XLSX) [file pone.0075909.s003.xlsx]

## Sheet: Sheet1
Probe Set ID	p-value	Fold change	Gene Title
Les.3940.2.A1_at	4.25989e-05	40.6687	0
Les.3397.2.A1_at	0.0137179	37.7303	0
Les.840.1.A1_at	0.00109877	25.1177	0
Les.4820.1.S1_x_at	0.0101318	21.4351	cysteine protease inhibitor /// multicystatin
Les.3397.1.S1_at	0.00801148	21.2537	0
Les.3740.1.S1_at	0.00987628	16.7824	inhibitor of yeast proteinase A /// cathepsin D inhibitor protein
Les.2173.1.A1_at	0.00158593	11.5812	0
Les.1675.1.S1_at	0.00701052	11.278	wound-induced proteinase inhibitor II prepeptide
Les.3663.1.S1_at	0.000218701	9.44811	9612 protein
Les.3683.1.S1_at	3.35743e-05	8.73185	PR-5x
Les.3281.1.S1_at	0.0255993	8.72278	0
Les.804.1.S1_at	0.000765326	7.17471	0
Les.3974.1.A1_at	0.0284233	6.95232	metallocarboxypeptidase inhibitor
Les.3210.2.A1_at	0.00606922	6.93791	0
LesAffx.30832.1.S1_at	0.00408787	6.53367	0
Les.3299.2.A1_s_at	0.00137171	6.00278	arginase 2
Les.796.1.A1_at	0.0482166	5.99599	carbonic anhydrase
Les.4299.1.S1_at	0.000138187	5.94405	0
Les.3210.1.S1_at	0.000781004	5.942	0
Les.84.1.S1_at	0.00910874	5.82217	leucine aminopeptidase
LesAffx.1.1.S1_at	0.00212536	5.71292	arginase 2
LesAffx.53591.1.S1_at	0.0105019	5.47241	0
LesAffx.71016.1.S1_at	0.00159255	5.45662	0
Les.4948.1.S1_at	0.00149504	5.37212	0
Les.51.1.S1_at	0.00095068	5.29093	ribonuclease
Les.191.1.S1_at	0.000258496	5.00385	expansin
Les.3286.1.S1_at	0.00268289	4.86869	0
Les.3266.2.S1_at	0.0141664	4.45097	0
Les.435.1.S1_at	0.000622683	4.26396	0
Les.3299.1.S1_at	0.000292592	4.24866	Arginase 2
Les.4880.1.S1_at	0.000446736	4.0432	0
Les.3636.1.S1_at	0.0439827	4.03937	endo-1,4-beta-D-glucanase
Les.647.1.A1_at	0.0245919	3.95914	0
Les.2946.2.S1_at	0.0102005	3.90614	0
Les.3266.3.S1_at	0.0098428	3.83227	0
Les.441.1.S1_s_at	0.00149151	3.7593	lipid desaturase-like protein
Les.1175.2.S1_at	0.0068119	3.73007	0
LesAffx.9910.1.S1_at	0.0330887	3.69521	0
Les.122.1.S1_at	0.00024344	3.60893	chitinase
Les.5240.1.S1_at	0.00760388	3.39606	0
Les.4488.1.S1_at	0.020266	3.36089	threonine deaminase
LesAffx.43341.1.S1_at	0.00140357	3.28568	0
LesAffx.63231.1.S1_at	0.0233508	3.23666	0
LesAffx.11941.1.S1_at	0.000395686	3.15259	Phytophthora-inhibited protease 1
Les.3210.2.A1_a_at	0.00182092	3.14379	0
Les.2529.2.S1_at	0.00023015	3.11599	0
Les.3408.1.S1_at	0.0306924	3.0821	PR protein
Les.3652.1.S1_at	0.0297174	3.06338	glucan endo-1,3-beta-D-glucosidase
Les.3021.1.S1_at	0.00619598	3.04303	0
LesAffx.837.1.S1_at	0.00181733	3.0401	0
Les.5759.1.S1_at	3.58016e-05	2.96157	0
Les.3575.1.S1_at	0.00560834	2.92327	Pti5
Les.5530.1.S1_at	0.0190714	2.91975	0
Les.2529.1.A1_at	0.00188721	2.88736	0
Les.65.1.S1_at	0.00108054	2.83742	gibberellin 20-oxidase-2
Les.513.1.S1_at	0.00871282	2.764	0
Les.4468.2.S1_at	0.000426286	2.7003	0
Les.4724.1.S1_at	0.0430589	2.69968	0
LesAffx.62349.1.S1_at	0.00332072	2.68852	0
Les.3140.2.S1_at	0.00873329	2.64059	0
Les.5044.1.S1_at	0.0393219	2.63681	0
Les.828.1.A1_at	0.0233116	2.63447	0
Les.3460.1.S1_at	0.00504436	2.61551	acid invertase
LesAffx.18587.1.S1_at	0.000499275	2.60501	0
LesAffx.69808.1.S1_at	0.00346273	2.60218	0
LesAffx.37337.1.S1_at	0.0447361	2.59964	0
Les.4140.1.S1_at	0.0309055	2.56796	0
Les.4462.1.S1_at	7.85313e-05	2.54718	wound induced protein
Les.4912.1.S1_at	0.00112098	2.52715	0
Les.73.1.S1_at	2.63722e-05	2.4948	hypothetical LOC544136
Les.2137.1.S1_at	0.0288377	2.47542	EIX receptor 1
Les.3046.1.S1_at	0.0236836	2.46466	0
Les.4460.1.S1_at	0.0102814	2.4425	pathogenesis-related protein P2
LesAffx.10235.1.S1_at	0.00245088	2.44103	0
LesAffx.16769.1.S1_at	3.30778e-05	2.38436	0
LesAffx.57572.1.S1_at	0.00948722	2.35045	0
Les.2560.1.S1_at	0.00410438	2.34969	gene product (aa 1-295)
Les.3635.1.S1_at	0.000632044	2.33477	subtilisin-like protease
Les.3505.1.S1_at	0.000130006	2.32465	verticillium wilt disease resistance protein
Les.2971.2.A1_at	0.0440633	2.31775	0
Les.1997.1.S1_at	0.0290941	2.29572	0
Les.1997.3.A1_at	0.0414347	2.28502	0
LesAffx.10955.3.S1_at	0.0076633	2.28327	0
LesAffx.10955.1.S1_at	0.00797483	2.2778	0
Les.1604.1.A1_at	0.0190597	2.25263	0
Les.2747.1.S1_at	0.0194016	2.25162	0
Les.4924.1.S1_at	0.0472574	2.23901	0
LesAffx.49321.2.S1_at	0.0102398	2.22784	0
Les.3140.3.S1_at	0.0123923	2.21965	0
Les.178.1.S1_at	0.0147717	2.20394	0
Les.2747.2.S1_at	0.0152546	2.19335	0
Les.1997.2.S1_at	0.0337221	2.18598	0
Les.275.1.S1_at	0.00595458	2.17333	formate dehydrogenase
LesAffx.16165.1.S1_at	0.00564119	2.10099	0
LesAffx.63935.1.S1_at	0.0268879	2.09695	0
LesAffx.66354.1.S1_at	0.0356473	2.0506	0
Les.4596.1.S1_at	0.0483955	2.0216	60S ribosomal protein L10
Les.13.1.S1_at	0.0184417	2.01548	allene oxide synthase
Les.3502.1.S1_at	0.0303687	2.01401	auxin-regulated dual specificity cytosolic kinase
Les.3581.1.S1_at	0.0498302	-3.00099	class II small heat shock protein Le-HSP17.6
Les.2012.1.S1_at	0.00411601	-2.99185	Myo-inositol-1-phosphate synthase
LesAffx.52572.1.S1_at	0.0377699	-2.96138	CONSTANS 1
Les.3539.1.S1_at	0.00333135	-2.62486	phosphoenolpyruvate carboxylase kinase
LesAffx.63523.1.S1_at	0.000427716	-2.52306	0
LesAffx.37636.1.S1_at	0.0395471	-2.41304	0
Les.3369.2.S1_at	0.027986	-2.31646	0
LesAffx.61047.1.S1_at	0.0176333	-2.23458	0
LesAffx.3572.1.A1_at	0.0321375	-2.19486	0
Les.4829.1.S1_at	0.0184668	-2.18471	2-oxoglutarate-dependent dioxygenase
Les.3551.1.S1_at	0.0292399	-2.14455	ethylene-responsive transcriptional coactivator
Les.1499.1.A1_at	0.00512168	-2.1393	0
Les.1923.1.S1_at	0.0438838	-2.13321	0
LesAffx.71493.2.S1_at	0.00473368	-2.12668	0
LesAffx.41316.1.S1_at	0.00575767	-2.04128	0
LesAffx.57251.1.S1_at	0.00515035	-2.03601	0
LesAffx.63523.2.S1_at	0.000353196	-2.01642	0
